# Supplementary material for: Epithelial-to-Mesenchymal Transition Mediates Resistance to Maintenance Therapy with Vinflunine in Advanced Urothelial Cell Carcinoma
Source: MDPI journal article supplement (doi:10.3390/cancers13246235), 2021-12-12
Supplement: s1 [file s1]

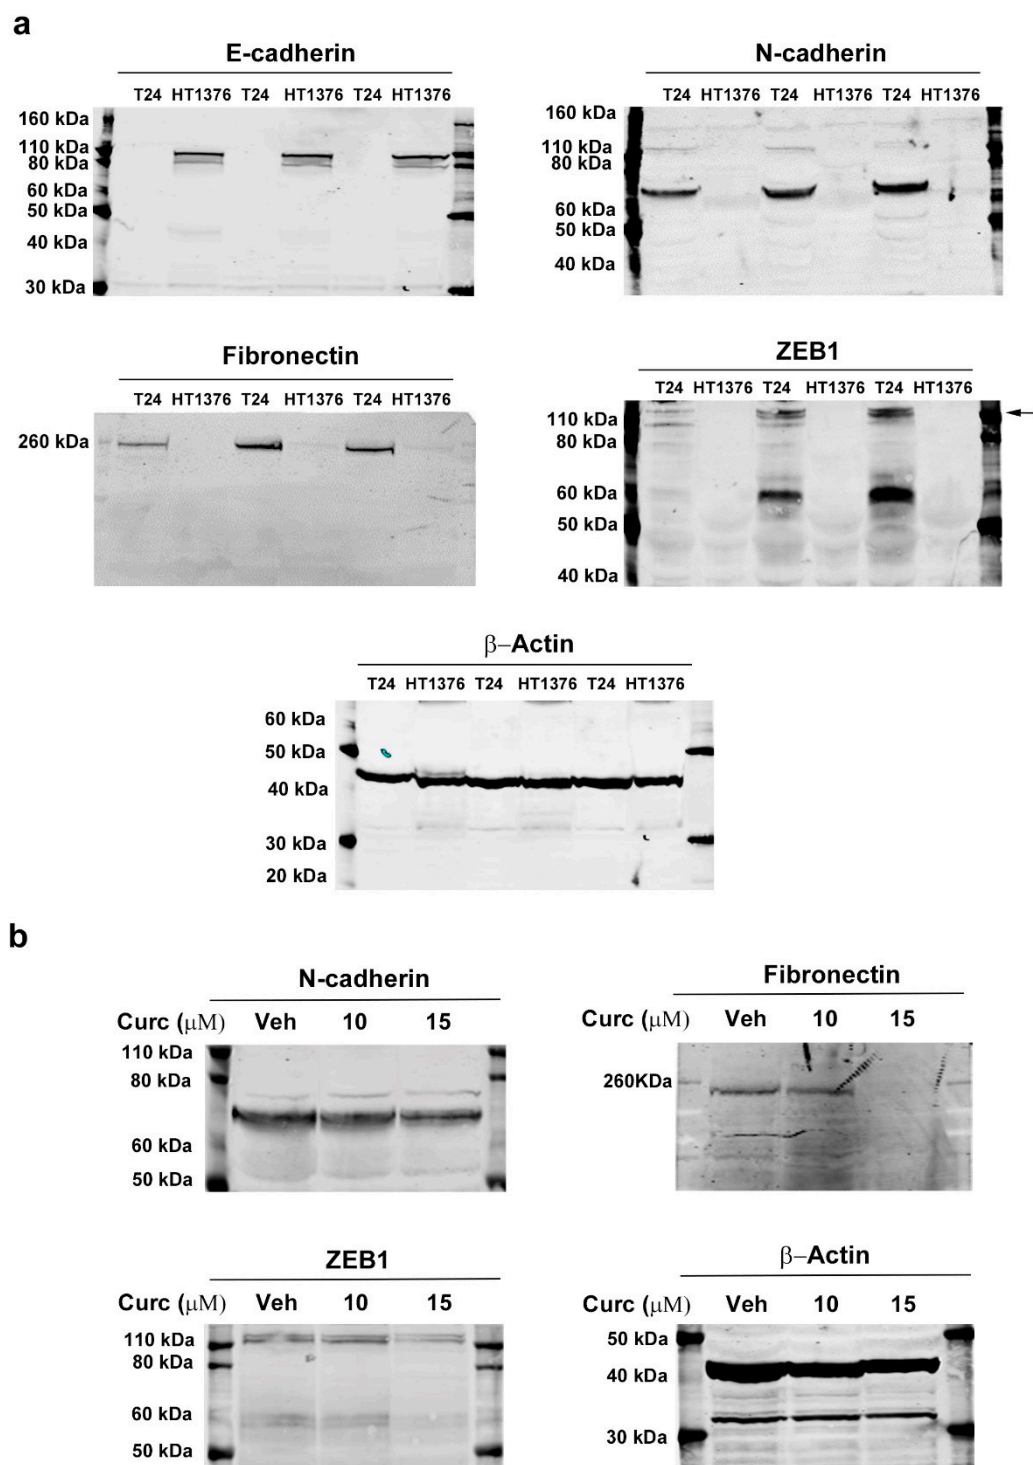

**Figure S1.** Non-cropped western blots from Figure 4 (a) and Figure 5 (b).

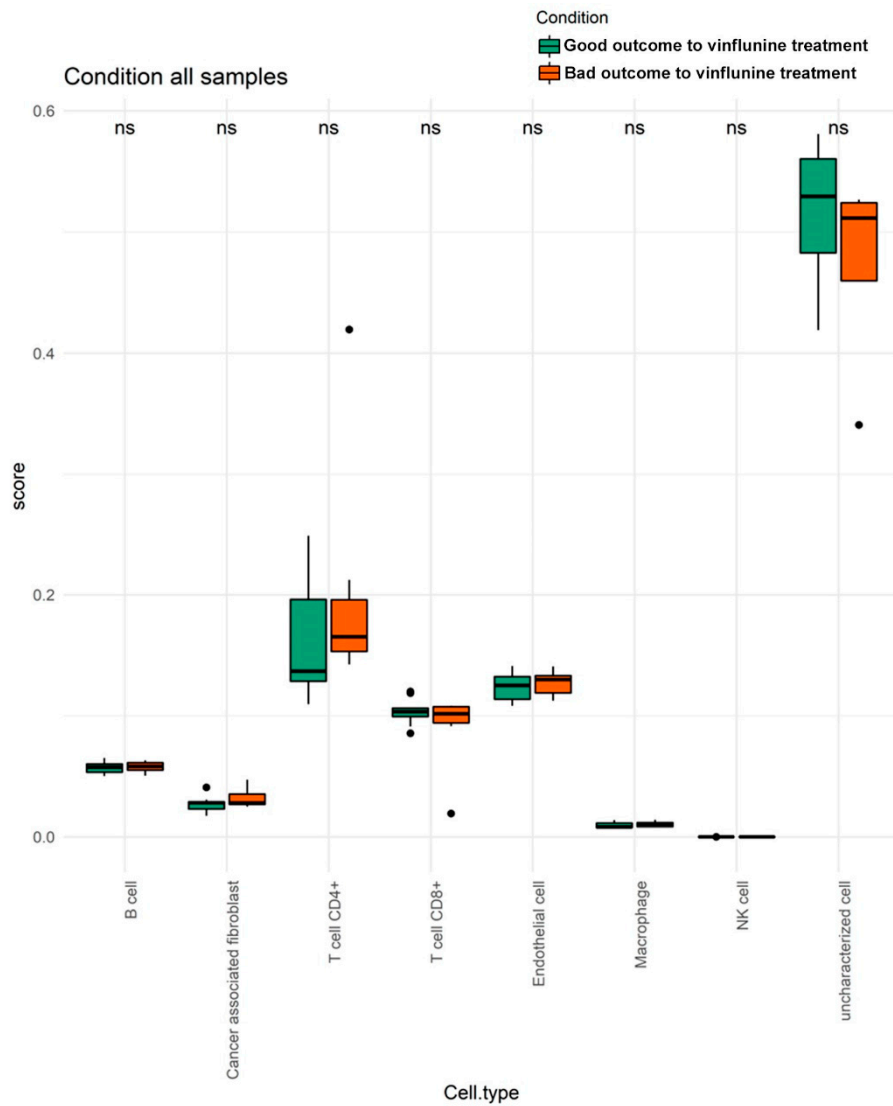

**Figure S2. Box plot depicting the distribution of different cell types scores.** For each cell type obtained and each studied condition, a box plot depicting the distribution of the scores was plotted. Statistical differences between patients with good and poor outcomes were assessed with the Student's t-test (Wilcoxon rank sum test). ns= not significant.

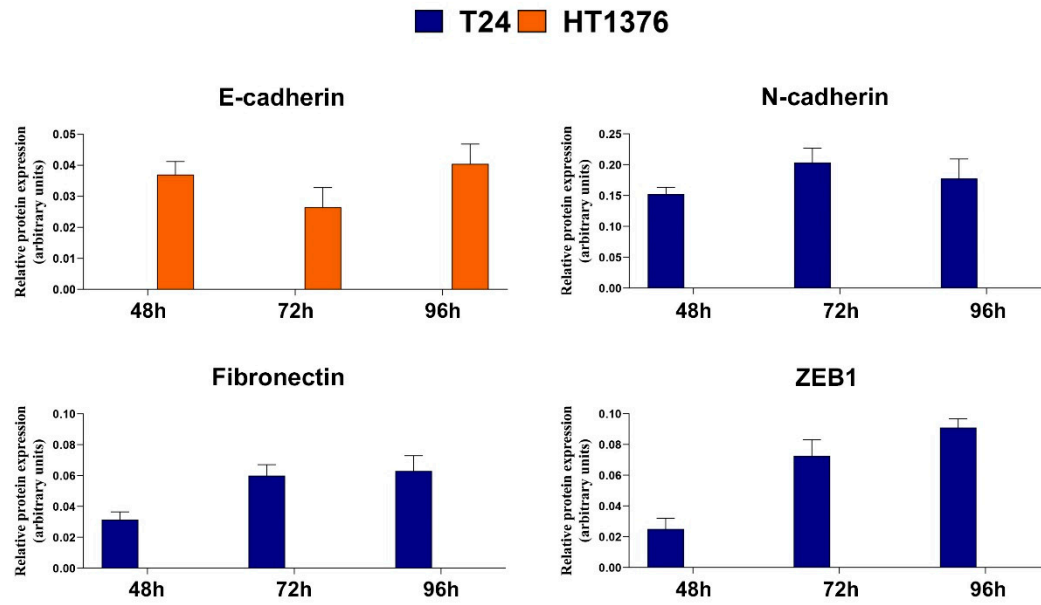

**Figure S3.** Semi-quantitative analysis for the Western Blot from Figure 4a.
